# Supplementary material for: A standard for normalizing the outputs of triboelectric nanogenerators in various modes
Source: Royal Society of Chemistry journal article supplement (doi:10.1039/d2ee01553f), 2022-01-01
Supplement: d2ee01553f1.pdf [file d2ee01553f1.pdf]

## Electronic Supplementary Information

### **A standard for normalizing the outputs of triboelectric nanogenerators in various modes**

**Da Zhao,<sup>‡ab</sup> Xin Yu,<sup>‡a</sup> Jianlong Wang,<sup>‡ab</sup> Qi Gao,<sup>a</sup> Zhenjie Wang,<sup>a</sup>  
Tinghai Cheng<sup>\*ab</sup> and Zhong Lin Wang<sup>\*ac</sup>**

<sup>a</sup> *Beijing Institute of Nanoenergy and Nanosystems, Chinese Academy of Sciences, Beijing 101400, P. R. China. E-mail: [chengtinghai@binn.cas.cn](mailto:chengtinghai@binn.cas.cn).*

<sup>b</sup> *School of Mechatronic Engineering, Changchun University of Technology, Changchun, Jilin 130012, P. R. China.*

<sup>c</sup> *School of Materials Science and Engineering, Georgia Institute of Technology, Atlanta, GA 30332-0245, USA. E-mail: [zhong.wang@mse.gatech.edu](mailto:zhong.wang@mse.gatech.edu).*

† Electronic Supplementary Information (ESI) available. See DOI:  
10.1039/x0xx00000x

‡ *These authors contributed equally to this work.*

## Supplementary Figures

**Fig. S1.** Schematic diagram of four different mode TENGs.

**Fig. S2.** Normalized analysis of output voltage and current for mechanical structures of C-S and L-S mode TENGs.

**Fig. S3.** Normalized analysis of output voltage and current for mechanical structures of S-E and F-S mode TENGs.

**Fig. S4.** Normalized analysis of output performance under different resistances and capacitances for contact area and film thickness in S-E and F-S mode TENGs.

**Fig. S5.** Normalized analysis of output voltage and current for external excitations of C-S and L-S mode TENGs.

**Fig. S6.** Normalized analysis of output voltage and current for external excitations of S-E and F-S mode TENGs.

**Fig. S7.** Normalized analysis of output performance under different resistances and capacitances for displacement distance and applied force in S-E and F-S mode TENGs.

**Fig. S8.** Normalized analysis of output voltage and current for triggering frequency of C-S and L-S mode TENGs.

**Fig. S9.** Normalized analysis of output voltage and current for triggering frequency of S-E and F-S mode TENGs.

**Fig. S10.** Normalizing outputs under different resistances and capacitances for triggering frequency in S-E and F-S mode TENGs.

**Fig. S11.** Normalization of optimal peak power for TENGs of S-E mode and F-S mode under different load resistance and capacitance.

**Fig. S12.** Photograph of the evaluating prototype.

**Fig. S13.** Photograph of a variable frequency prototype.

## Supplementary Tables

**Table S1.** The influence degree of each factor for TENGs

**Table S2.** The parameters list of the evaluated prototype.

**Table S3.** The matching resistance and capacitance of the evaluated prototypes.

## Supplementary Notes

**Supplementary Note 1.** Theoretical calculation.

**Supplementary Note 2.** Calculation of matching reactance for evaluation prototypes.

## Supplementary Figures

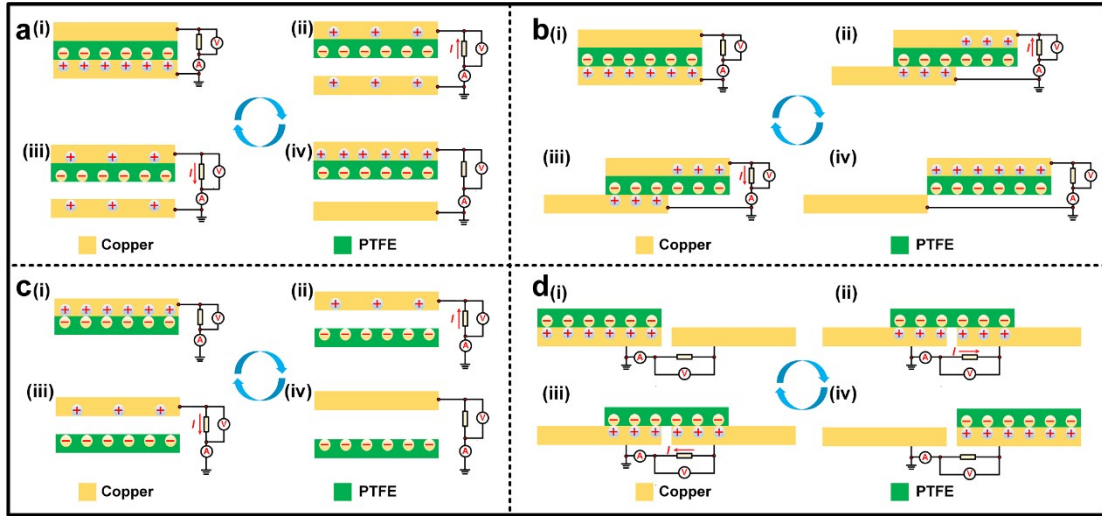

**Fig. S1.** Schematic diagram of four different mode TENGs. (a) C-S mode TENG, (b) L-S mode TENG, (c) S-E mode TENG, (d) F-S mode TENG.

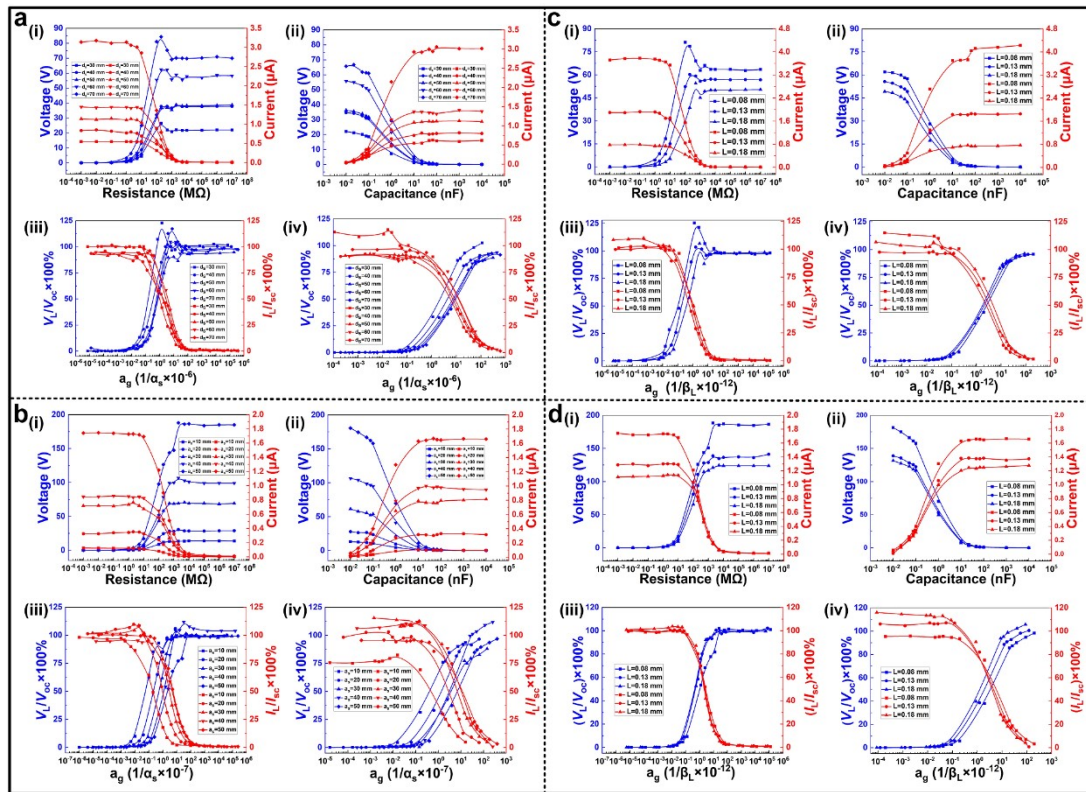

**Fig. S2.** Normalized analysis of output voltage and current for mechanical structures of C-S and L-S mode TENGs. The output performance (i, ii) and normalized data (iii, iv) of C-S and L-S (b, d) mode TENGs in different contact areas (a, b) and film thicknesses (c, d).

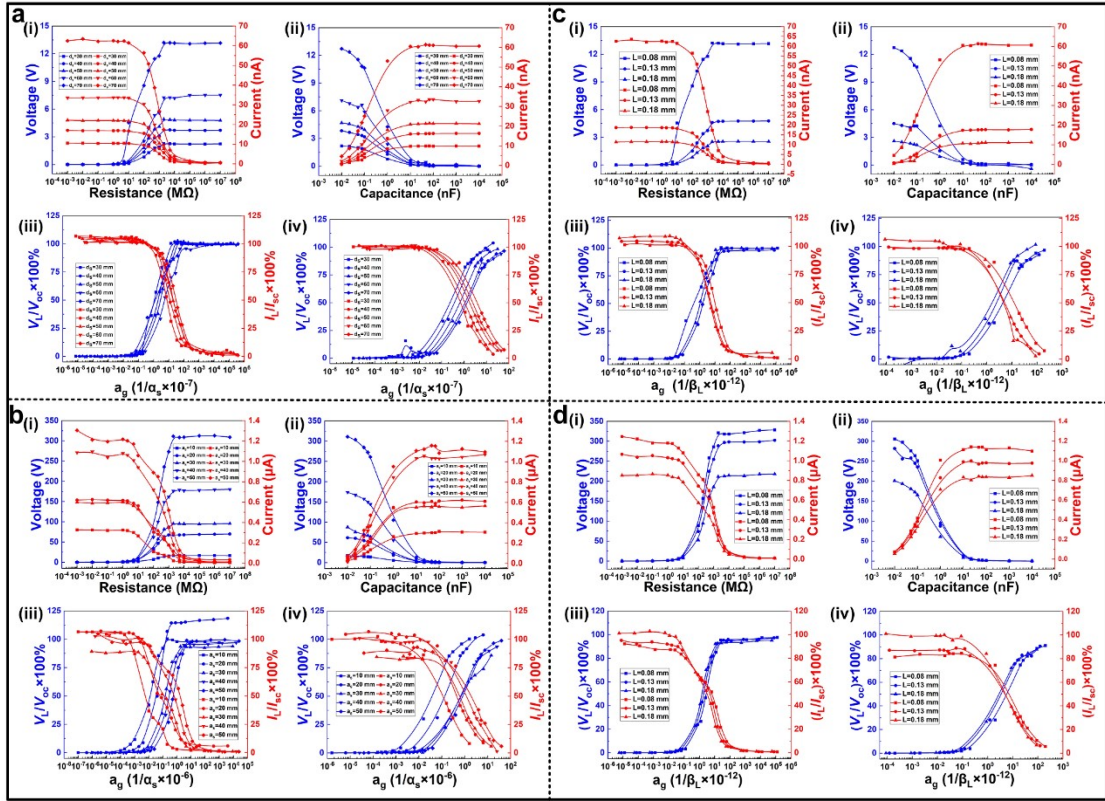

**Fig. S3.** Normalized analysis of output voltage and current for mechanical structures of S-E and F-S mode TENGs. The output performance (i, ii) and normalized data (iii, iv) of S-E (a, c) and F-S (b, d) mode TENGs in different contact areas (a, b) and film thicknesses (c, d).

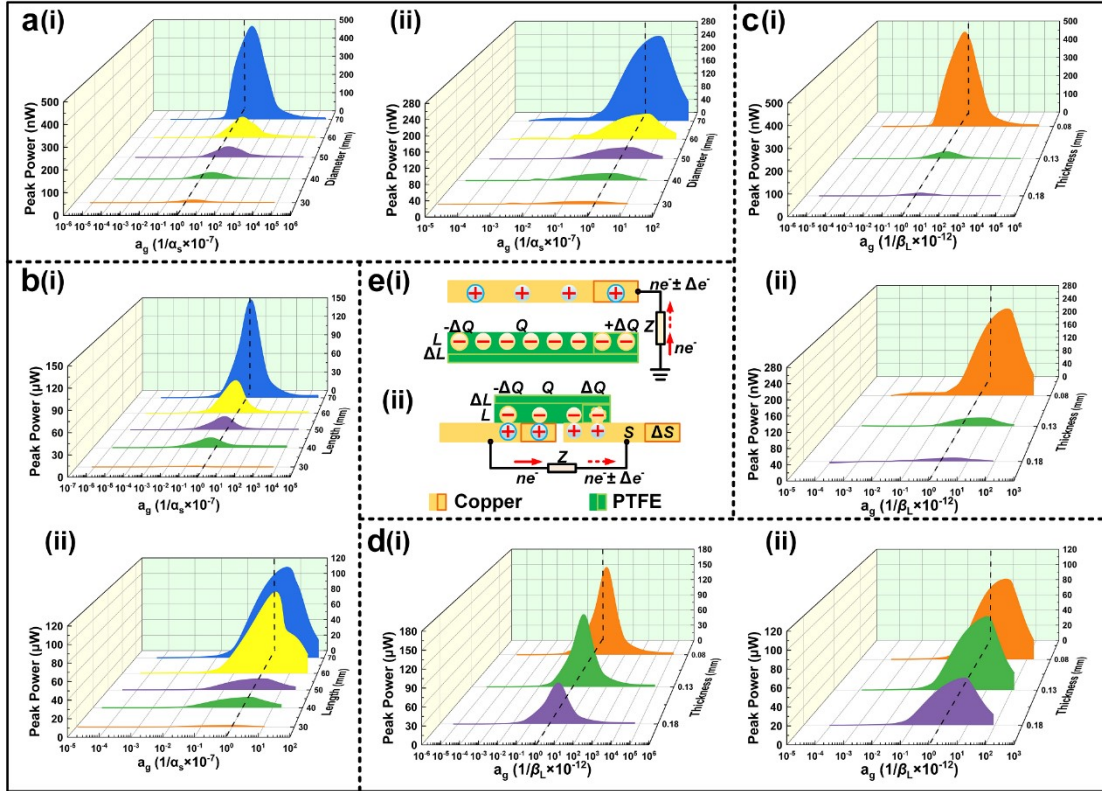

**Fig. S4.** Normalized analysis of output performance under different resistances (i) and capacitances (ii) for contact area (a, b) and film thickness (c, d) in S-E (a, c) and F-S (b, d) mode TENGs. (e) Diagram of charge transfer in S-E and F-S mode TENGs with changes in contact area and film thickness.

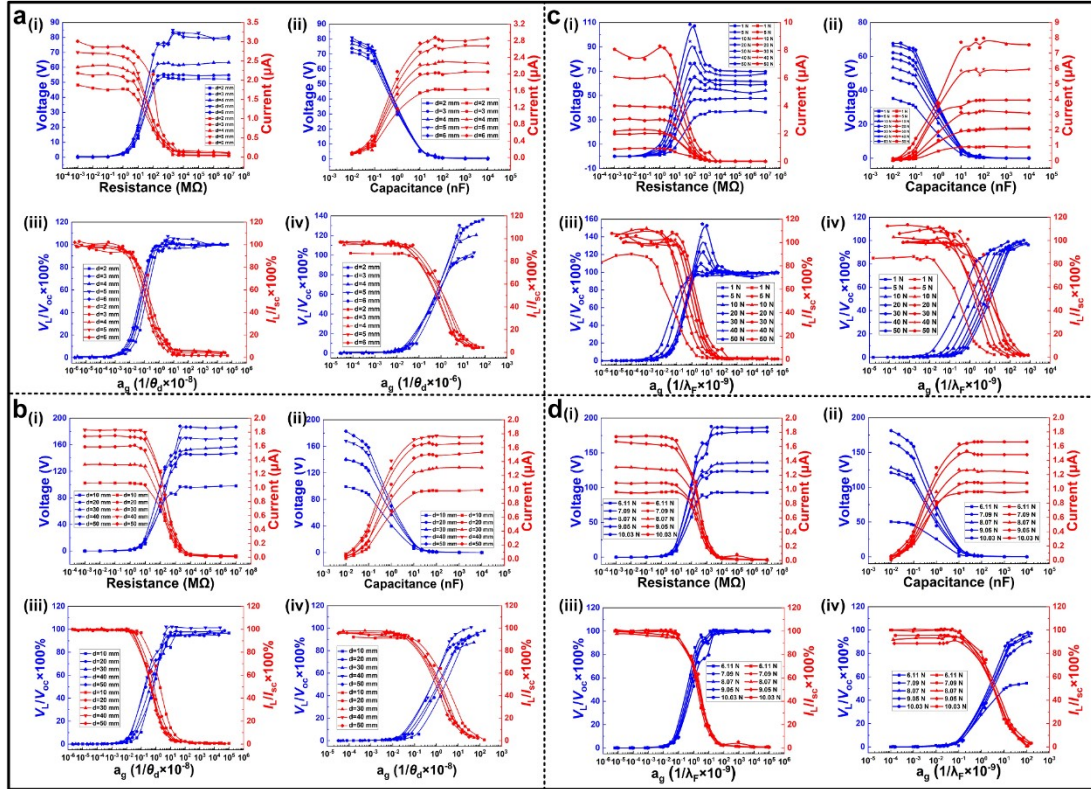

**Fig. S5.** Normalized analysis of output voltage and current for external excitations of C-S and L-S mode TENGs. The output performance (i, ii) and normalized data (iii, iv) of C-S (a, c) and L-S (b, d) mode TENGs in different displacement distances (a, b) and applied forces (c, d).

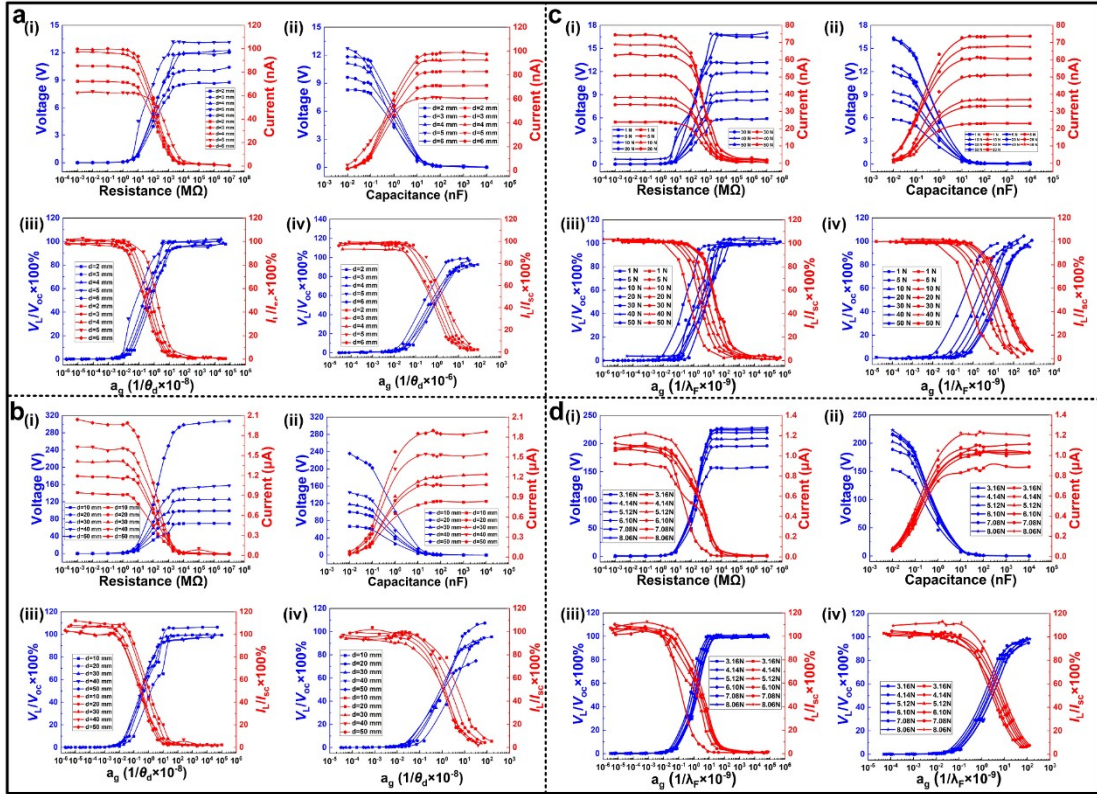

**Fig. S6.** Normalized analysis of output voltage and current for external excitations of S-E and F-S mode TENGs. The output performance (i, ii) and normalized data (iii, iv) of S-E (a, c) and F-S (b, d) mode TENGs in different displacement distances (a, b) and applied forces (c, d).

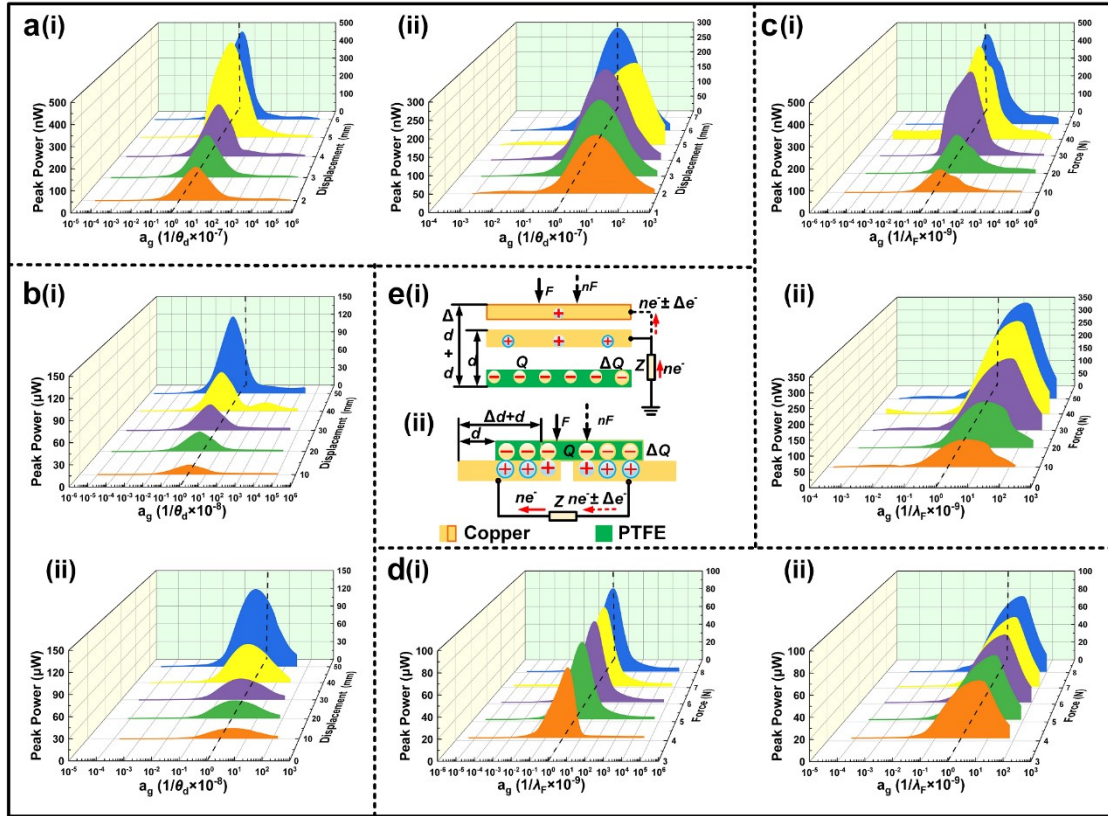

**Fig. S7.** Normalized analysis of output performance under different resistances (i) and capacitances (ii) for displacement distance (a, b) and applied force (c, d) in S-E (a, c) and F-S (b, d) mode TENGs. (e) Diagram of charge transfer in S-E and F-S mode TENGs with changes in displacement distance and applied force.

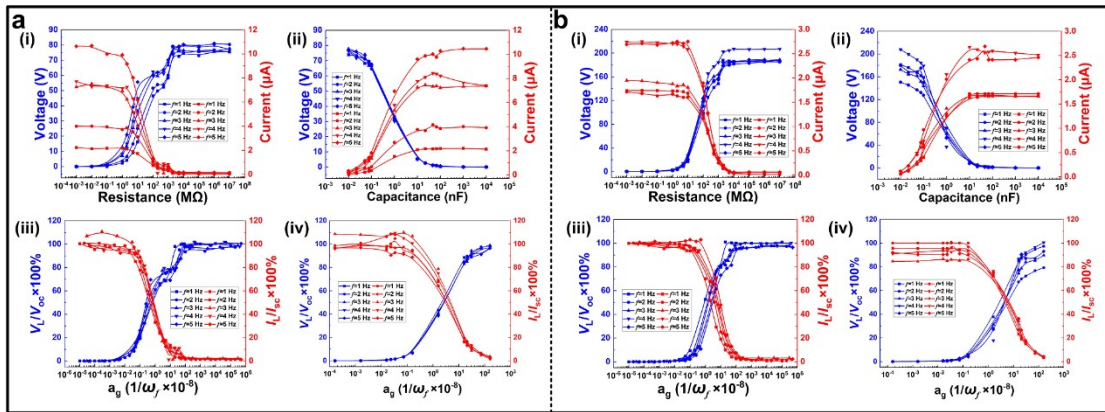

**Fig. S8.** Normalized analysis of output voltage and current for triggering frequency of C-S and L-S mode TENGs. The output performance (i, ii) and normalized data (iii, iv) of C-S (a) and L-S (b) mode TENGs in different frequencies.



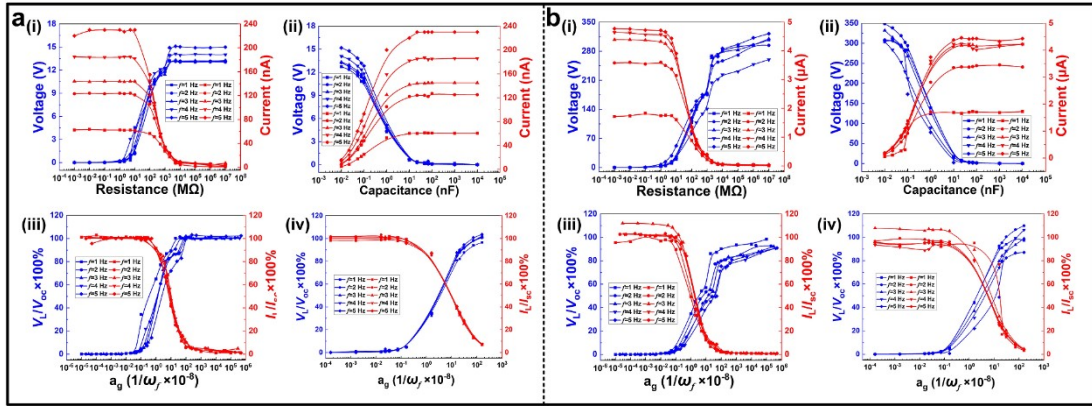

**Fig. S9.** Normalized analysis of output voltage and current for triggering frequency of S-E and F-S mode TENGs. The output performance (i, ii) and normalized data (iii, iv) of S-E (a) and F-S (b) mode TENGs in different frequencies.

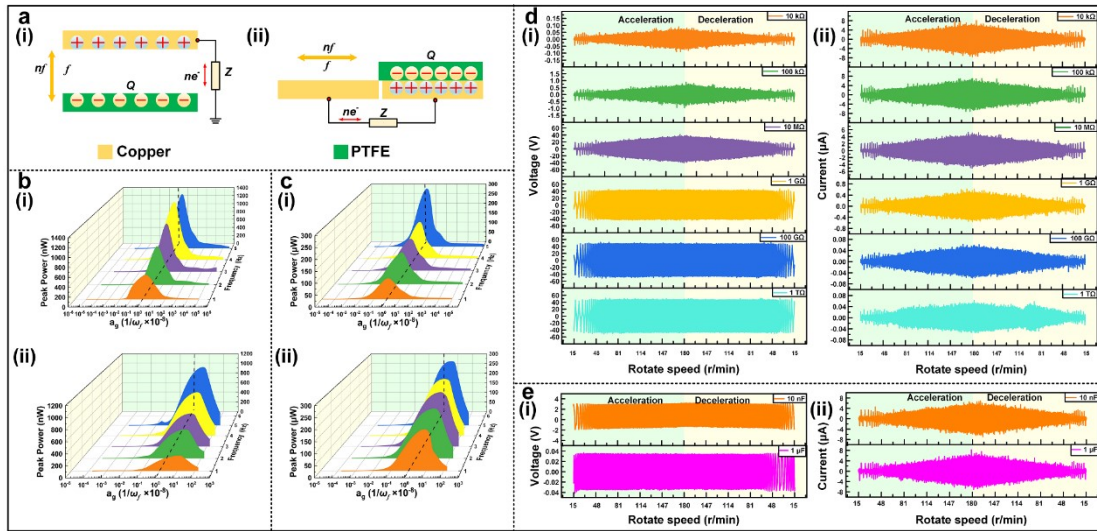

**Fig. S10.** Normalizing outputs under different resistances (i) and capacitances (ii) for triggering frequency in S-E (b) and F-S (c) mode TENGs. (a) Schematic diagram of S-E (i) and F-S (ii) mode TENGs changing with triggering frequency. (d, e) The output performance of TENGs as triggering frequency changes under different resistances (d) and capacitances (e).

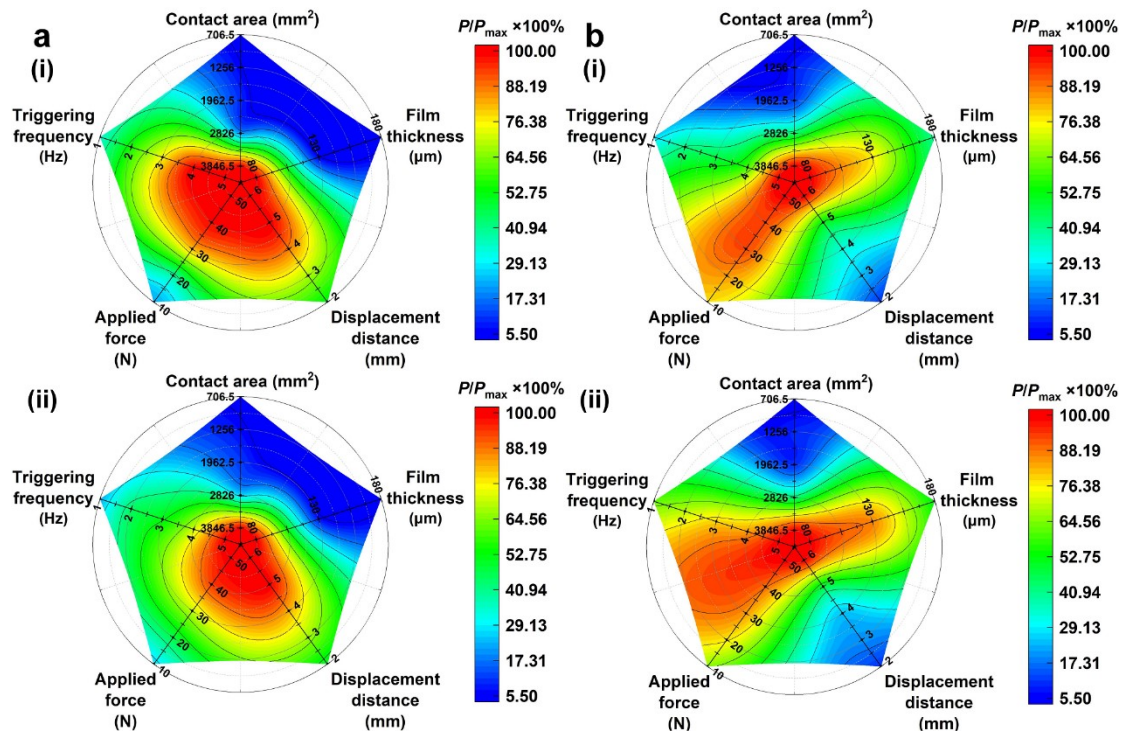

**Fig. S11.** Normalization of optimal peak power for TENGs of S-E mode (a) and F-S mode (b) under different load resistance (i) and capacitance (ii).

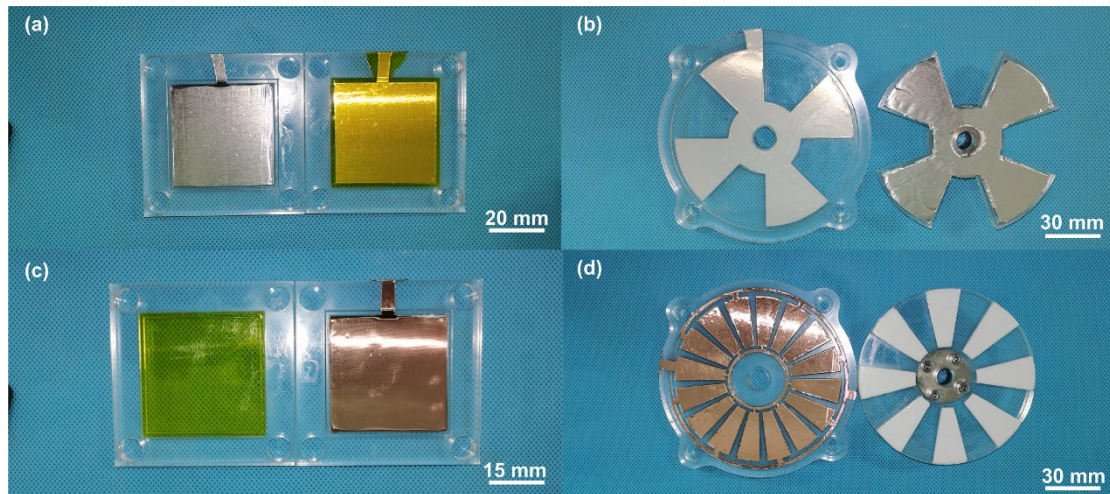

**Fig. S12.** Photograph of the evaluating prototype.

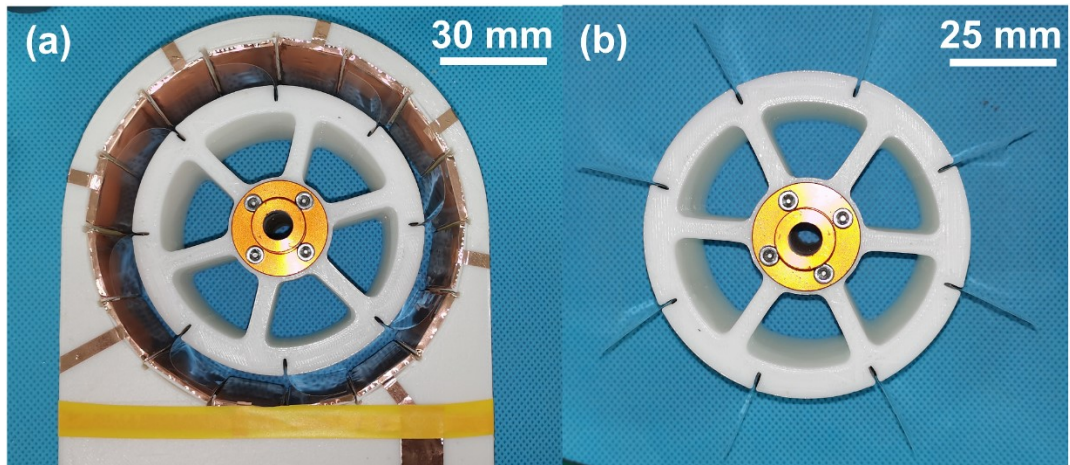

**Fig. S13.** Photograph of a variable frequency prototype.

## Supplementary Tables

**Table S1.** The definitions of important parameters of the TENG.

| <b>Symbo</b> | <b>Definitions</b>                   | <b>Symbol</b> | <b>Definitions</b>                                   |
|--------------|--------------------------------------|---------------|------------------------------------------------------|
| <b>I</b>     |                                      |               |                                                      |
| $S$          | contact area                         | $C0$          | internal capacitance                                 |
| $L$          | film thickness                       | $CL$          | load capacitance                                     |
| $d$          | displacement distance                | $P_R$         | power of the load resistance                         |
| $F$          | applied force                        | $PC$          | power of the load capacitance                        |
| $f$          | triggering frequency                 | $\sigma$      | charge density                                       |
| $C_1$        | variable capacitance                 | $t$           | time of current changes                              |
| $C_2$        | constant capacitance                 | $\rho$        | resistivity of the dielectric layer                  |
| $R_0$        | internal resistance                  | $k$           | the electrostatic force constant                     |
| $C_3$        | inductive capacitors                 | $\epsilon r1$ | the relative dielectric constant of dielectric layer |
| $T$          | the thickness of triboelectric layer | $\epsilon r2$ | the relative dielectric constant of environment.     |
| $I1$         | the load current                     | $ag$          | reactance matching value                             |
| $RL$         | matching resistance                  | $a$           | the side length for L-S, F-S mode                    |
| $CL$         | matching capacitor                   | $I_0$         | internal current                                     |

**Table S2.** The influence degree of each factor for TENGs

| <b>Types</b>                 | <b>C-S mode</b> |       | <b>L-S mode</b> |       | <b>S-E mode</b> |       | <b>F-S mode</b> |       |       |
|------------------------------|-----------------|-------|-----------------|-------|-----------------|-------|-----------------|-------|-------|
|                              | <b>Load</b>     | $R$   | $C$             | $R$   | $C$             | $R$   | $C$             | $R$   | $C$   |
| <b>Contact area</b>          |                 | 93.38 | 94.40           | 99.39 | 99.57           | 97.61 | 97.19           | 99.31 | 98.52 |
| <b>Film thickness</b>        |                 | 89.12 | 86.64           | 38.98 | 46.06           | 97.58 | 96.79           | 60.52 | 47.99 |
| <b>Displacement distance</b> |                 | 58.94 | 48.97           | 61.96 | 70.03           | 47.84 | 50.47           | 88.66 | 89.22 |
| <b>Applied force</b>         |                 | 88.58 | 73.49           | 69.29 | 77.94           | 78.00 | 73.62           | 21.81 | 34.42 |
| <b>Triggering frequency</b>  |                 | 90.08 | 76.71           | 56.07 | 46.75           | 77.63 | 66.31           | 73.36 | 37.90 |

**Table S3.** The parameters list of the evaluated prototype.

| <b>Working mode of TENGs</b>                          | <b>C-S mode</b>                                                                     | <b>L-S mode</b>                                                                     | <b>S-E mode</b>                                                                      | <b>F-S mode</b>                                                                       |
|-------------------------------------------------------|-------------------------------------------------------------------------------------|-------------------------------------------------------------------------------------|--------------------------------------------------------------------------------------|---------------------------------------------------------------------------------------|
| Electrode                                             | Kapton+Al                                                                           | PTFE+Al                                                                             | Kapton+Cu                                                                            | PTFE+Al                                                                               |
| Contact area<br><b><math>S</math> (m<sup>2</sup>)</b> | 0.0025                                                                              | 0.0045                                                                              | 0.0025                                                                               | 0.0051                                                                                |
| Film thickness<br><b><math>L</math> (mm)</b>          | 0.05                                                                                | 0.18                                                                                | 0.05                                                                                 | 0.08                                                                                  |
| Displacement distance <b><math>d</math></b>           | 5 mm                                                                                | 40°                                                                                 | 5 mm                                                                                 | 17.5°                                                                                 |
| Applied force <b><math>F</math> (N)</b>               | 20 N                                                                                | NA                                                                                  | 20 N                                                                                 | NA                                                                                    |
| Triggering frequency <b><math>f</math></b>            | 1 Hz                                                                                | 30 r/min (2 Hz)                                                                     | 1 Hz                                                                                 | 15 r/min (2 Hz)                                                                       |
| Prototype                                             | 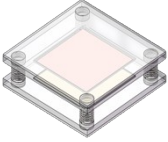 |  |  |  |

**Table S4.** The matching resistance and capacitance of the evaluated prototypes.

|                                         | <b>C-S mode</b>       | <b>L-S mode</b>             | <b>S-E mode</b>             | <b>F-S mode</b>             |
|-----------------------------------------|-----------------------|-----------------------------|-----------------------------|-----------------------------|
| Resistance ( <b><math>R_0</math></b> )  | $10^{7\sim 8} \Omega$ | $10^8 \Omega$               | $10^{7\sim 8} \Omega$       | $10^8 \Omega$               |
| Capacitance ( <b><math>C_T</math></b> ) | $10^{-9} \text{ F}$   | $10^{-10\sim -9} \text{ F}$ | $10^{-10\sim -9} \text{ F}$ | $10^{-10\sim -9} \text{ F}$ |

## Supplementary Notes

### Supplementary Note 1. Theoretical calculation.

Eqs. (S1) and (S2) are the transformational power equations of the triboelectric nanogenerators (TENG).

$$P_R = \frac{I_0^2 R_0^2 R_L}{R_L^2 + \left( \frac{1}{2\pi f} \left( \frac{1}{C_1} + \frac{1}{C_2} \right) \right)^2} \quad (\text{S1})$$

$$P_C = \frac{I_0^2 R_0^2 \left( \frac{1}{2\pi f C_L} \right)}{\left( \frac{1}{2\pi f} \left( \frac{1}{C_1} + \frac{1}{C_2} + \frac{1}{C_L} \right) \right)^2} \quad (\text{S2})$$

The matching values for the contact area, film thickness, displacement distance, applied force and triggering frequency are shown in Eqs. (S4), (S6), (S9), (S11) and (S13), respectively.

$$\alpha_s = \sqrt{(\rho \cdot T)^2 + \left( \frac{2k}{f} \left( \frac{L}{\varepsilon_{r1}} + \frac{D}{\varepsilon_{r2}} \right) \right)^2} \quad (\text{S3})$$

$$\begin{cases} a_g = \frac{1}{\alpha_s} \mathfrak{g}(\Delta R_L \mathfrak{g} \Delta S) \\ a_g = \frac{1}{2\pi f} \mathfrak{g} \frac{1}{\alpha_s} \mathfrak{g} \left( \frac{\Delta S}{\Delta C_L} \right) \end{cases} \quad (\text{S4})$$

$$\beta_L \approx \frac{2k}{fS\varepsilon_{r1}} \quad (\text{S5})$$

$$\begin{cases} a_g \approx \frac{1}{\beta_L} \mathfrak{g} \frac{\Delta R_L}{\Delta L} \\ a_g \approx \frac{1}{2\pi f \beta_L} \mathfrak{g} \frac{1}{\Delta C_L \Delta L} \end{cases} \quad (\text{S6})$$

$$\theta_{d1} \approx \frac{2k}{fS\varepsilon_{r1}} \quad (\text{S7})$$

$$\theta_{d2} \approx \frac{2kL}{fa\varepsilon_{r1}} \quad (\text{S8})$$

$$\left\{ \begin{array}{l} a_g \approx \frac{1}{\theta_{d1}} \mathbf{g} \frac{\Delta R_L}{\Delta d} \text{ (C-S \& S-E modes)} \\ a_g \approx \frac{1}{\theta_{d1}} \mathbf{g} \Delta R_L \Delta d \text{ (L-S \& F-S modes)} \\ a_g \approx \frac{1}{2\pi f} \mathbf{g} \frac{1}{\theta_{d2}} \mathbf{g} \frac{1}{\Delta d \Delta C_L} \text{ (C-S \& S-E modes)} \\ a_g \approx \frac{1}{2\pi f} \mathbf{g} \frac{1}{\theta_{d2}} \mathbf{g} \frac{\Delta d}{\Delta C_L} \text{ (L-S \& F-S modes)} \end{array} \right. \quad (\text{S9})$$

$$\lambda_F \approx \frac{2k}{f \epsilon_{r1}} \quad (\text{S10})$$

$$\left\{ \begin{array}{l} a_g \approx \frac{1}{\lambda_F} \mathbf{g} \Delta R_L \mathbf{g} \left( \frac{S}{L} \right) \\ a_g \approx \frac{1}{\lambda_F} \mathbf{g} \frac{1}{2\pi f \Delta C_L} \mathbf{g} \left( \frac{S}{L} \right) \end{array} \right. \quad (\text{S11})$$

$$\omega_f \approx \frac{2kL}{S \epsilon_{r1}} \quad (\text{S12})$$

$$\left\{ \begin{array}{l} a_g \approx \frac{\Delta R_L}{\omega_f} \mathbf{g} \mathbf{f} \\ a_g \approx \frac{1}{2\pi} \mathbf{g} \frac{1}{\omega_f} \mathbf{g} \frac{1}{\Delta C_L} \end{array} \right. \quad (\text{S13})$$

It is expressed as follows that the normalization of the output voltage and current:

$$\eta_V = \frac{V_L}{V_{oc}} \times 100\% \quad (\text{S14})$$

$$\eta_I = \frac{I_L}{I_{sc}} \times 100\% \quad (\text{S15})$$

Among them, the performance ratio of voltage and current, load voltage and current, as well as open-circuit voltage and short-circuit current are represented by  $\eta_V$  and  $\eta_I$ ,  $V_L$  and  $V_{oc}$ ,  $I_L$  and  $I_{sc}$  respectively.

**Supplementary Note 2.** Calculation of matching reactance of evaluation prototypes.

When the load reactance matches the internal reactance ( $a_g=1$ ), the maximum power is produced by TENGs. According to the resistance calculation formula:  $R = \rho T/S$ , the internal resistances ( $R_{\text{PTFE}}, R_{\text{Kapton}}$ ) of TENGs are displayed by Eqs. (S16), (S17) when the dielectric layer is PTFE and Kapton, respectively.

$$R_{\text{PTFE}} \approx \frac{10^{15} \times 10^{-10}}{10^{-3}} \approx 10^8 \ \Omega \quad (\text{S16})$$

$$R_{\text{Kapton}} \approx \frac{10^{14:15} \times 10^{-10}}{10^{-3}} \approx 10^{7:8} \ \Omega \quad (\text{S17})$$

where  $\rho, S$  stands for the resistivity of the dielectric layer and relative contact area of TENG. Moreover, the surface of the dielectric layer is polarized after TENG is electrified by friction, so  $T$  is the thickness of the triboelectric monolayer, which is generally about  $10^{-10}$  m. Therefore, the internal resistance of C-S and S-E modes is  $R_{\text{Kapton}} \approx 10^7 \sim 8 \ \Omega$ , and that of L-S and F-S modes is  $R_{\text{PTFE}} \approx 10^8 \ \Omega$ .

Accord formula:  $C = \epsilon_r \epsilon_0 S / 4\pi k d$ , the internal constant capacitance ( $C_{\text{P-1}}, C_{\text{K-1}}$ ) and variable capacitance ( $C_{\text{P-0}}, C_{\text{K-0}}$ ) of TENGs are expressed as Eqs. (S18-21) when the dielectric layer is PTFE and Kapton, respectively.

$$C_{\text{P-1}} \approx \frac{10^{-11} \times 10^{-3}}{10^{-5}} \approx 10^{-10 \sim -9} \ \text{F} \quad (\text{S18})$$

$$C_{\text{K-1}} \approx \frac{10^{-11} \times 10^{-3}}{10^{-5}} \approx 10^{-9} \ \text{F} \quad (\text{S19})$$

$$C_{\text{P-0}} \approx \frac{10^{-11} \times 10^{-3}}{10^{-6 \sim -5}} \approx 10^{-9 \sim -8} \ \text{F} \quad (\text{S20})$$

$$C_{\text{K-0}} \approx \frac{10^{-11} \times 10^{-3}}{10^{-6 \sim -5}} \approx 10^{-9 \sim -8} \ \text{F} \quad (\text{S21})$$

where  $\epsilon_r, \epsilon_0, d$  and  $S$  is relative dielectric constant, the vacuum dielectric constant, distance between two parallel plates of capacitance and the relative area.

For S-E and F-S modes, the inductive capacitances ( $C_{\text{SE-0}}, C_{\text{FS-0}}$ ) are also generated in the substrate and dielectric layer.

$$C_{\text{SE-0}} \approx \frac{10^{-11} \times 10^{-3}}{10^{-5 \sim -4}} \approx 10^{-10 \sim -9} \ \text{F} \quad (\text{S22})$$



$$C_{FS-0} \approx \frac{10^{-11} \times 10^{-3}}{10^{-4 \sim -5}} \approx 10^{-10 \sim -9} \text{ F} \quad (\text{S23})$$

Because the capacitances are in series, the total capacitance is smaller than the smallest capacitance. Additionally, Table S3 displays the specific internal resistance and capacitance. The capacitances of C-S ( $C_{CS}$ ), L-S ( $C_{LS}$ ), S-E ( $C_{SE}$ ) and F-S ( $C_{FS}$ ) modes TENGs are the inherent capacitance ( $C_{CS} \approx 10^{-9} \text{ F}$ ,  $C_{LS} \approx 10^{-10 \sim -9} \text{ F}$ ) and inductive capacitance ( $C_{SE} \approx 10^{-10 \sim -9} \text{ F}$ ,  $C_{FS} \approx 10^{-10 \sim -9} \text{ F}$ ), respectively. Overall, the above formula is only an empirical formula, and it can be used to quickly determine internal resistance and capacitance.
